# Supplementary material for: Neuropsychological outcomes of children with Optic Pathway Glioma
Source: PubMed Central journal article supplement (PMC7039908; doi:10.1038/s41598-020-59896-2), 2020-02-24
Supplement: 41598_2020_59896_MOESM1_ESM.pdf [file 41598_2020_59896_MOESM1_ESM.pdf]

## SUPPLEMENTARY MATERIALS

### Neuropsychological outcomes of children with Optic Pathway Glioma

Chiara Papini, Robert A. Dineen, David A. Walker, Shery Thomas, Nicola J. Pitchford.

**Table S1.** Analysis of the characteristics of each neuropsychological subtest.

| Domain             | Test                  | Scale                 | Subtest                            | Vision                  | Fine motor            | Timed |   |   |
|--------------------|-----------------------|-----------------------|------------------------------------|-------------------------|-----------------------|-------|---|---|
| Visual perception  | DTVP-2 /              | MRP                   | Position in space <sup>a</sup>     | 1                       | 0                     | 0     |   |   |
|                    |                       |                       | Figure-ground                      | 1                       | 0                     | 0     |   |   |
|                    |                       |                       | Visual closure                     | 1                       | 0                     | 0     |   |   |
|                    |                       |                       | Form constancy                     | 1                       | 0                     | 0     |   |   |
|                    | DVTP-A                | VMI                   | Eye-hand coordination <sup>a</sup> | 1                       | 1                     | 0     |   |   |
|                    |                       |                       | Copying                            | 1                       | 1                     | 0     |   |   |
|                    |                       |                       | Spatial relations <sup>a</sup>     | 1                       | 1                     | 0     |   |   |
|                    |                       |                       | Visual-motor speed                 | 1                       | 1                     | 1     |   |   |
| Cognitive function | WISC-IV <sup>UK</sup> | VC                    | Similarities                       | 0                       | 0                     | 0     |   |   |
|                    |                       |                       | Vocabulary                         | 0                       | 0                     | 0     |   |   |
|                    |                       | PR                    | Comprehension                      | 0                       | 0                     | 0     |   |   |
|                    |                       |                       | Block design <sup>c</sup>          | 1                       | 1                     | 0/1   |   |   |
|                    |                       |                       | Picture concept                    | 1                       | 0                     | 0     |   |   |
|                    |                       | WM                    | Matrix reasoning                   | 1                       | 0                     | 0     |   |   |
|                    |                       |                       | Digit span                         | 0                       | 0                     | 0     |   |   |
|                    |                       | PS                    | Letter-number sequence             | 0                       | 0                     | 0     |   |   |
|                    |                       |                       | Coding                             | 1                       | 1                     | 1     |   |   |
|                    |                       |                       | Symbol searching                   | 1                       | 1                     | 1     |   |   |
|                    |                       |                       | Visual-motor search <sup>b</sup>   | 1                       | 1                     | 1     |   |   |
|                    |                       | Scholastic attainment | WIAT-II <sup>UK</sup>              | R                       | Word reading          | 1     | 0 | 0 |
|                    |                       |                       |                                    |                         | Reading comprehension | 1     | 0 | 0 |
|                    |                       |                       |                                    |                         | Pseudoword decoding   | 1     | 0 | 0 |
| M                  | Numerical operations  |                       |                                    | 1                       | 1                     | 0     |   |   |
|                    | Mathematica reasoning |                       |                                    | 1                       | 0                     | 0     |   |   |
| WL                 | Spelling              |                       |                                    | 1                       | 1                     | 0     |   |   |
|                    | Written expression    |                       |                                    | 1                       | 1                     | 0     |   |   |
|                    | OL                    |                       |                                    | Listening comprehension | 1                     | 0     | 0 |   |
| Oral expression    |                       | 1                     | 0                                  | 1                       |                       |       |   |   |

MRP = Motor-Reduced Perception; VMI = Visual-Motor Integration; VC = Verbal Comprehension; PR = Perceptual Reasoning; WM = Working Memory; PS = Processing Speed; R = Reading; M = Mathematics; WL = Written Language; OL = Oral Language.

<sup>a</sup> Subtest included only in the DTVP-2.

<sup>b</sup> Subtest included only in the DVTP-A.

<sup>c</sup> In our sample, there was no discrepancy between scores with and without time bonus.

**Table S2.** Descriptive statistics (M and SD) and comparison to test norms (*t*-statistic and *P*-value) on each neuropsychological index for sporadic and syndromic OPGs.

|                                                   | Index | Sporadic               |          |                     | Syndromic              |          |                     |
|---------------------------------------------------|-------|------------------------|----------|---------------------|------------------------|----------|---------------------|
|                                                   |       | <i>M</i> ( <i>SD</i> ) | <i>n</i> | <i>t</i> , <i>P</i> | <i>M</i> ( <i>SD</i> ) | <i>n</i> | <i>t</i> , <i>P</i> |
| Visual perception<br>(DTVP-2/DTVP-A)              | MRP   | 93.2 (13.2)            | 5        | -1.15, .315         | 83.3 (14.0)            | 7        | -3.17, .019         |
|                                                   | VMI   | 85.0 (23.2)            | 5        | -1.45, .222         | 82.4 (14.8)            | 7        | -3.13, .020         |
|                                                   | GVP   | 88.2 (18.6)            | 5        | -1.42, .230         | 81.9 (14.3)            | 7        | -3.35, .015         |
| Cognitive functioning<br>(WISC-IV <sup>UK</sup> ) | VC    | 94.4 (13.8)            | 5        | -0.91, .415         | 88.6 (14.6)            | 5        | -1.74, .157         |
|                                                   | PR    | 102.0 (15.5)           | 5        | 0.29, .787          | 89.0 (17.2)            | 5        | -1.43, .225         |
|                                                   | WM    | 90.0 (3.7)             | 5        | -5.98, .004         | 80.8 (10.5)            | 5        | -4.10, .015         |
|                                                   | PS    | 91.6 (14.6)            | 5        | -1.29, .268         | 83.4 (15.8)            | 5        | -2.35, .079         |
|                                                   | FSIQ  | 93.8 (8.6)             | 5        | -1.60, .184         | 82.6 (11.5)            | 5        | -3.38, .028         |
| Scholastic attainment<br>(WIAT-II <sup>UK</sup> ) | GA    | 98.2 (9.8)             | 5        | -0.41, .703         | 87.8 (12.1)            | 5        | -2.25, .087         |
|                                                   | R     | 101.8 (8.0)            | 5        | 0.50, .641          | 85.8 (13.0)            | 5        | -2.45, .071         |
|                                                   | M     | 106.6 (17.0)           | 5        | 0.87, .435          | 91.0 (18.4)            | 5        | -1.09, .335         |
|                                                   | WL    | 92.4 (11.3)            | 5        | -1.51, .206         | 85.6 (16.0)            | 5        | -2.01, .114         |
|                                                   | OL    | 91.6 (10.7)            | 5        | -1.76, .154         | 85.4 (17.8)            | 5        | -1.83, .141         |
|                                                   | TC    | 98.0 (10.8)            | 5        | -0.41, .700         | 84.8 (14.8)            | 5        | -2.30, .083         |

MRP = Motor-Reduced Perception; VMI = Visual-Motor Integration; GVP = General Visual Perception; VC = Verbal Comprehension; PR = Perceptual Reasoning; WM = Working Memory; PS = Processing Speed; FSIQ = Full-Scale IQ; GA = General Ability; R = Reading; M = Mathematics; WL = Written Language; OL = Oral Language; TC = Total Composite.
